# Supplementary material for: Novel energetic metal–organic frameworks assembled from the energetic combination of furazan and tetrazole
Source: Royal Society of Chemistry journal article supplement (doi:10.1039/d0dt00862a), 2020-01-01
Supplement: d0dt00862a1.pdf [file d0dt00862a1.pdf]

## Supporting Information

### Novel Energetic Metal-organic Frameworks Assembled with the Energetic Combination of Furazan and Tetrazole

Hao, Wenjia<sup>a</sup>; Jin, Bo<sup>a\*</sup>; Zhang, Jinhao<sup>a</sup>; Li, Xiaoyi<sup>a</sup>; Huang, Tao<sup>a</sup>; Shen, Juan<sup>b</sup>; Peng, Rufang<sup>a</sup>

<sup>a</sup> State Key Laboratory of Environment-friendly Energy Materials, Southwest University of Science and Technology, Sichuan Mianyang 621010, China

<sup>b</sup> School of Materials Science and Engineering, Southwest University of Science and Technology, Mianyang 621010, China

\* jinbo0428@163.com

#### 1. Instruments and reagents

The FT-IR spectra were recorded on a *PerkinElmer Spectrum 100* infrared spectrometer (KBr pellets) in the range of 4000 – 400  $\text{cm}^{-1}$  with a resolution of 4  $\text{cm}^{-1}$ . Elemental analyses of C, H and N were performed on a Vario EL-III analyzer. TGA-DSC measurement was carried by using *404 F1* differential scanning calorimeter (*Netzsch*).

#### 2. FT-IR

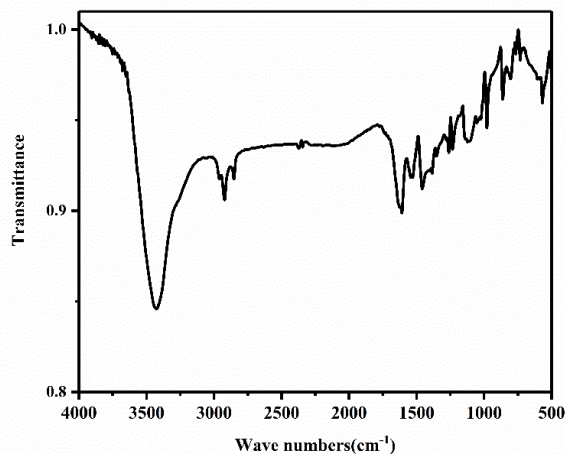

**Figure S1.** FT-IR spectrum of [Pb(BTF)(H<sub>2</sub>O)<sub>2</sub>]<sub>n</sub>

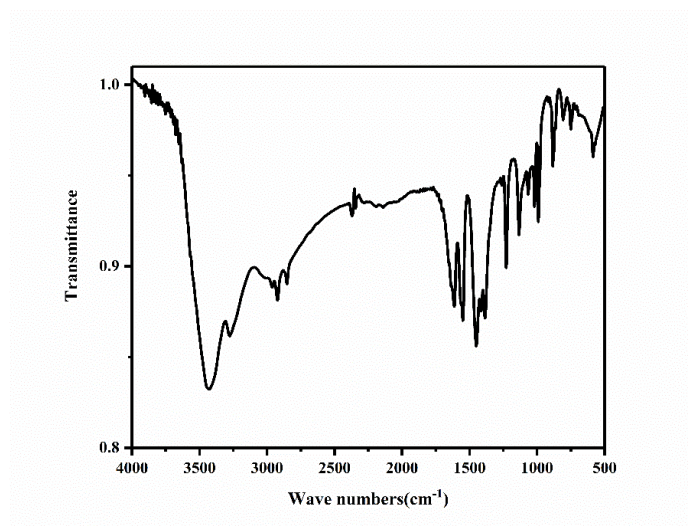

Figure S2. FT-IR spectrum of  $[\text{Ba}(\text{BTF})(\text{H}_2\text{O})_4]_n$

### 3. X-ray crystallographic data

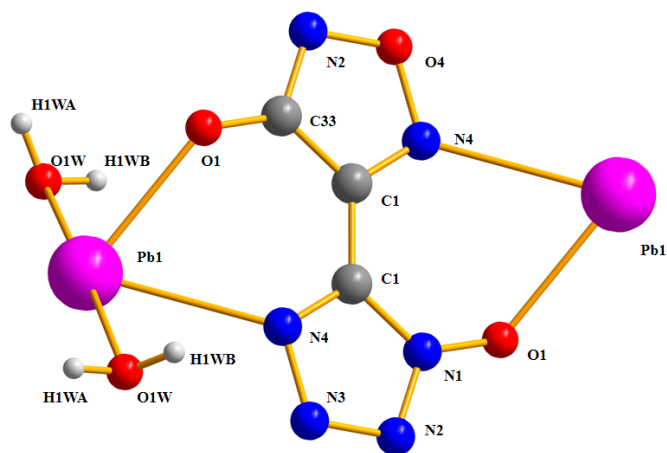

Figure S3. Coordination environment of Pb(II).

Table S1. Bond Lengths [ $\text{\AA}$ ] for  $[\text{Pb}(\text{BTF})(\text{H}_2\text{O})_2]_n$

| Bond                 | Length/ $\text{\AA}$ |
|----------------------|----------------------|
| Pb1-O1 <sup>1</sup>  | 2.593(3)             |
| Pb1-O1               | 2.605(3)             |
| Pb1-O1 <sup>2</sup>  | 2.593(3)             |
| Pb1-N4               | 2.845(2)             |
| Pb1-O1 <sup>3</sup>  | 2.605(3)             |
| Pb1-O1W <sup>3</sup> | 2.648(4)             |
| Pb1-O1W              | 2.648(4)             |
| O1-Pb1 <sup>4</sup>  | 2.593(3)             |
| O1-N1                | 1.306(6)             |
| O1-C3                | 1.306(6)             |

|                                                                                                                                   |          |
|-----------------------------------------------------------------------------------------------------------------------------------|----------|
| N1-N2                                                                                                                             | 1.329(6) |
| N1-C1                                                                                                                             | 1.397(6) |
| N2-N3                                                                                                                             | 1.363(5) |
| N2-C3                                                                                                                             | 1.329(6) |
| N2-O4                                                                                                                             | 1.363(5) |
| N3-N4                                                                                                                             | 1.366(5) |
| N4-C1                                                                                                                             | 1.317(6) |
| N4-O4                                                                                                                             | 1.366(5) |
| C1-C1 <sup>5</sup>                                                                                                                | 1.499(8) |
| C1-C3 <sup>3</sup>                                                                                                                | 1.397(6) |
| <sup>1</sup> 1-X,-1+Y,1/2-Z; <sup>2</sup> +X,-1+Y,+Z; <sup>3</sup> 1-X,+Y,1/2-Z; <sup>4</sup> +X,1+Y,+Z; <sup>5</sup> 1-X,1-Y,1-Z |          |

**Table S2.** Bond Angles [°] for [Pb(BTF)(H<sub>2</sub>O)<sub>2</sub>]<sub>n</sub>.

| Bond                                                                                                                              | Angle/°    | Bond                    | Angle/°  |
|-----------------------------------------------------------------------------------------------------------------------------------|------------|-------------------------|----------|
| O1 <sup>1</sup> -Pb1-O1 <sup>2</sup>                                                                                              | 64.30(16)  | C33-O1-Pb1 <sup>4</sup> | 114.6(2) |
| O1 <sup>2</sup> -Pb1-O1                                                                                                           | 115.86(15) | C33-O1-Pb1              | 128.7(2) |
| O11-Pb1-O1                                                                                                                        | 179.84(6)  | O1-N1-N2                | 123.1(4) |
| O1 <sup>1</sup> -Pb1-O1 <sup>3</sup>                                                                                              | 115.86(15) | O1-N1-C1                | 128.4(4) |
| O1 <sup>2</sup> -Pb1-O1 <sup>3</sup>                                                                                              | 179.84(6)  | N2-N1-C1                | 108.4(4) |
| O1 <sup>3</sup> Pb1-O1                                                                                                            | 63.98(16)  | N2-N3-N4                | 111.0(3) |
| O1-Pb1-O1W <sup>3</sup>                                                                                                           | 76.19(12)  | C1-N4-N3                | 105.7(4) |
| O1 <sup>2</sup> -Pb1-O1W <sup>3</sup>                                                                                             | 73.89(12)  | C1-N4-O4                | 105.7(4) |
| O1 <sup>1</sup> -Pb1-O1W <sup>3</sup>                                                                                             | 103.88(12) | N1-C1-C1 <sup>5</sup>   | 126.0(5) |
| O1 <sup>2</sup> -Pb1-O1W                                                                                                          | 103.88(12) | N4-C1-N1                | 109.2(4) |
| O1 <sup>3</sup> -Pb1-O1W <sup>3</sup>                                                                                             | 106.04(12) | N4-C1-C1 <sup>5</sup>   | 124.8(5) |
| O1-Pb1-O1W                                                                                                                        | 106.04(12) | N4-C1-C33               | 109.2(4) |
| O1 <sup>1</sup> -Pb1-O1W                                                                                                          | 73.89(12)  | C33-C1-C1 <sup>5</sup>  | 126.0(5) |
| O1 <sup>3</sup> -Pb1-O1W                                                                                                          | 76.19(12)  | O1-C33-N2               | 123.1(4) |
| O1W-Pb1-O1W <sup>3</sup>                                                                                                          | 177.45(15) | O1-C33-C1               | 128.4(4) |
| Pb1 <sup>4</sup> -O1-Pb1                                                                                                          | 115.86(15) | N2-C33-C1               | 108.4(4) |
| N1-O1-Pb1 <sup>4</sup>                                                                                                            | 114.6(2)   | N2-O4-N4                | 111.0(3) |
| N1-O1-Pb1                                                                                                                         | 128.7(2)   |                         |          |
| <sup>1</sup> 1-X,-1+Y,1/2-Z; <sup>2</sup> +X,-1+Y,+Z; <sup>3</sup> 1-X,+Y,1/2-Z; <sup>4</sup> +X,1+Y,+Z; <sup>5</sup> 1-X,1-Y,1-Z |            |                         |          |

**Table S3.** Hydrogen Bond Lengths and Bond Angles for [Pb(BTF)(H<sub>2</sub>O)<sub>2</sub>]<sub>n</sub> [[Å] and [°]].

| Bond D-H...A                                                                                    | Length/Å (D-H) | Length/Å (H...A) | Length/Å (D...A) | Angle/° (DHA) |
|-------------------------------------------------------------------------------------------------|----------------|------------------|------------------|---------------|
| O(1W)-H(1WB)···O(1W) <sup>6</sup>                                                               | 0.87(2)        | 1.86(3)          | 2.710(5)         | 168(7)        |
| O(1W)-H(1WA)···N(2) <sup>1</sup>                                                                | 0.86(2)        | 2.36(5)          | 3.003(5)         | 131(6)        |
| O(1W)-H(1WA)···N(3 <sup>c</sup> ) <sup>7</sup>                                                  | 0.86(2)        | 2.40(5)          | 3.022(5)         | 130(5)        |
| <sup>1</sup> -x+1/2,y+1/2,-z+1/2; <sup>2</sup> -x+1,y-1,-z+1/2; <sup>3</sup> x-1/2,-y+3/2,z-1/2 |                |                  |                  |               |

**Table S4.** Atomic Occupancy for  $[\text{Pb}(\text{BTF})(\text{H}_2\text{O})_2]_n$ .

| Atom | Occupancy | Atom | Occupancy |
|------|-----------|------|-----------|
| N1   | 0.5       | N3   | 0.5       |
| O4   | 0.5       | C33  | 0.5       |

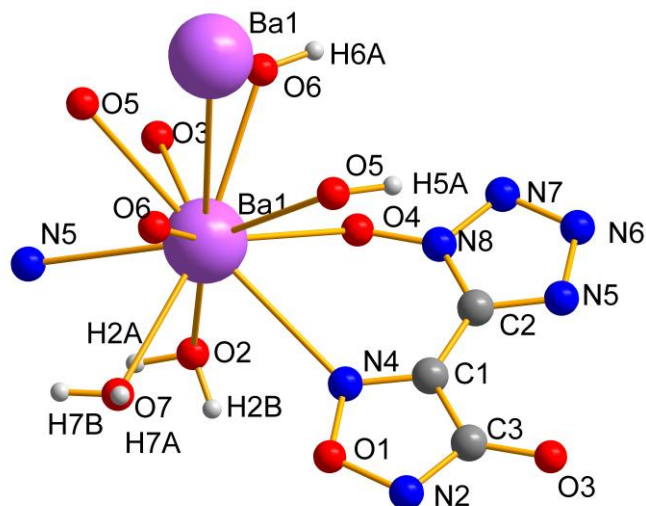

**Figure S4.** Coordination environment of Ba(II).

**Table S5.** Bond Lengths [ $\text{\AA}$ ] for  $[\text{Ba}(\text{BTF})(\text{H}_2\text{O})_4]_n$

| Bond                 | Length/ $\text{\AA}$ |
|----------------------|----------------------|
| Ba1-O4               | 2.724(5)             |
| Ba1-O2               | 2.764(6)             |
| Ba1-O3 <sup>1</sup>  | 2.767(5)             |
| Ba1-O6               | 2.793(5)             |
| Ba1-O6 <sup>2</sup>  | 2.830(6)             |
| Ba1-O7               | 2.910(6)             |
| Ba1-N5 <sup>1</sup>  | 2.953(6)             |
| Ba1-O5               | 2.961(5)             |
| Ba1-O5 <sup>2</sup>  | 3.000(5)             |
| Ba1-N4               | 3.109(6)             |
| Ba1-Ba1 <sup>2</sup> | 4.1958(8)            |
| O1-N4                | 1.368(8)             |
| O1-N2                | 1.381(8)             |
| C1-N4                | 1.312(10)            |
| C1-C3                | 1.411(10)            |
| C1-C2                | 1.452(10)            |
| O2-H2A               | 0.9269               |
| O2-H2B               | 0.9276               |
| C2-N5                | 1.332(10)            |
| C2-N8                | 1.363(10)            |

|                                                                                               |          |
|-----------------------------------------------------------------------------------------------|----------|
| N2-C3                                                                                         | 1.326(9) |
| O3-C3                                                                                         | 1.291(9) |
| O4-N8                                                                                         | 1.302(8) |
| N5-N6                                                                                         | 1.360(8) |
| O5-H5A                                                                                        | 0.95     |
| N6-N7                                                                                         | 1.342(9) |
| O6-H6A                                                                                        | 0.95     |
| N7-N8                                                                                         | 1.329(9) |
| O7-H7A                                                                                        | 0.907    |
| O7-H7B                                                                                        | 0.9067   |
| <sup>1</sup> -x+3/2,y+1/2,-z+3/2 <sup>2</sup> -x+1,-y+1,-z+2 <sup>3</sup> -x+3/2,y-1/2,-z+3/2 |          |

**Table S6.** Bond Angles [°] for [Ba(BTF)(H<sub>2</sub>O)<sub>4</sub>]<sub>n</sub>.

| Bond                                 | Angle/°    | Bond                                  | Angle/°    |
|--------------------------------------|------------|---------------------------------------|------------|
| O4-Ba1-O2                            | 72.84(18)  | O2-Ba1-Ba1 <sup>2</sup>               | 175.49(13) |
| O4-Ba1-O3 <sup>1</sup>               | 78.54(16)  | O3 <sup>1</sup> -Ba1-Ba1 <sup>2</sup> | 100.87(12) |
| O2-Ba1-O3 <sup>1</sup>               | 74.92(18)  | O6-Ba1-Ba1 <sup>2</sup>               | 42.07(11)  |
| O4-Ba1-O6                            | 75.11(16)  | O6 <sup>2</sup> -Ba1-Ba1 <sup>2</sup> | 41.40(11)  |
| O2-Ba1-O6                            | 135.68(18) | O7-Ba1-Ba1 <sup>2</sup>               | 106.90(14) |
| O3 <sup>1</sup> -Ba1-O6              | 69.32(16)  | N5 <sup>1</sup> -Ba1-Ba1 <sup>2</sup> | 112.01(12) |
| O4-Ba1-O6 <sup>1</sup>               | 135.71(16) | O5-Ba1-Ba1 <sup>2</sup>               | 45.64(10)  |
| O2-Ba1-O6 <sup>1</sup>               | 140.53(17) | O5 <sup>2</sup> -Ba1-Ba1 <sup>2</sup> | 44.88(10)  |
| O3 <sup>1</sup> -Ba1-O6 <sup>1</sup> | 128.91(16) | N4-Ba1-Ba1 <sup>2</sup>               | 111.26(13) |
| O6-Ba1-O6 <sup>2</sup>               | 83.47(17)  | N4-O1-N2                              | 110.9(5)   |
| O4-Ba1-O7                            | 128.98(17) | N4-C1-C3                              | 109.6(6)   |
| O2-Ba1-O7                            | 75.08(19)  | N4-C1-C2                              | 124.3(7)   |
| O3 <sup>1</sup> -Ba1-O7              | 128.64(19) | C3-C1-C2                              | 126.1(7)   |
| O6-Ba1-O7                            | 148.92(18) | Ba1-O2-H2A                            | 111.4      |
| O6 <sup>2</sup> -Ba1-O7              | 65.53(18)  | Ba1-O2-H2B                            | 111.9      |
| O4-Ba1-N5 <sup>1</sup>               | 127.85(18) | H2A-O2-H2B                            | 102.3      |
| O2-Ba1-N5 <sup>1</sup>               | 64.77(18)  | N5-C2-N8                              | 109.0(6)   |
| O3 <sup>1</sup> -Ba1-N5 <sup>1</sup> | 62.57(16)  | N5-C2-C1                              | 124.0(7)   |
| O6-Ba1-N5 <sup>1</sup>               | 116.78(16) | N8-C2-C1                              | 127.0(7)   |
| O6 <sup>2</sup> -Ba1-N5 <sup>1</sup> | 96.38(16)  | C3-N2-O1                              | 105.6(6)   |
| O7-Ba1-N5 <sup>1</sup>               | 67.16(19)  | C3-O3-Ba1 <sup>3</sup>                | 140.0(5)   |
| O4-Ba1-O5                            | 76.46(16)  | O3-C3-N2                              | 123.4(7)   |
| O2-Ba1-O5                            | 138.24(16) | O3-C3-C1                              | 128.5(7)   |
| O3 <sup>1</sup> -Ba1-O5              | 125.45(15) | N2-C3-C1                              | 108.1(6)   |
| O6-Ba1-O5                            | 57.72(14)  | N8-O4-Ba1                             | 136.4(5)   |
| O6 <sup>2</sup> -Ba1-O5              | 59.37(14)  | C1-N4-O1                              | 105.7(6)   |
| O7-Ba1-O5                            | 104.57(18) | C1-N4-Ba1                             | 128.2(5)   |
| N5 <sup>1</sup> -Ba1-O5              | 154.73(16) | O1-N4-Ba1                             | 122.0(4)   |
| O4-Ba1-O52                           | 131.84(15) | C2-N5-N6                              | 105.7(6)   |

|                                                                                               |            |                          |           |
|-----------------------------------------------------------------------------------------------|------------|--------------------------|-----------|
| O2-Ba1-O52                                                                                    | 131.15(16) | C2-N5-Ba1 <sup>3</sup>   | 135.4(5)  |
| O31-Ba1-O52                                                                                   | 72.02(16)  | N6-N5-Ba1 <sup>3</sup>   | 117.2(4)  |
| O6-Ba1-O52                                                                                    | 59.27(14)  | Ba1-O5-Ba1 <sup>2</sup>  | 89.48(14) |
| O6 <sup>2</sup> -Ba1-O52                                                                      | 56.89(14)  | Ba1-O5-H5A               | 119.8     |
| O7-Ba1-O52                                                                                    | 99.11(16)  | Ba1 <sup>2</sup> -O5-H5A | 126.7     |
| N5 <sup>1</sup> -Ba1-O52                                                                      | 68.38(16)  | N7-N6-N5                 | 110.2(6)  |
| O5-Ba1-O52                                                                                    | 90.52(14)  | Ba1-O6-Ba1 <sup>2</sup>  | 96.53(17) |
| O4-Ba1-N4                                                                                     | 60.90(16)  | Ba1-O6-H6A               | 119.9     |
| O2-Ba1-N4                                                                                     | 73.14(18)  | Ba1 <sup>2</sup> -O6-H6A | 127.7     |
| O3 <sup>1</sup> -Ba1-N4                                                                       | 133.97(17) | N8-N7-N6                 | 106.7(6)  |
| O6-Ba1-N4                                                                                     | 115.49(16) | Ba1-O7-H7A               | 111       |
| O6 <sup>2</sup> -Ba1-N4                                                                       | 96.48(16)  | Ba1-O7-H7B               | 110.6     |
| O7-Ba1-N4                                                                                     | 72.43(18)  | H7A-O7-H7B               | 103.2     |
| N5 <sup>1</sup> -Ba1-N4                                                                       | 127.17(17) | O4-N8-N7                 | 122.8(6)  |
| O5-Ba1-N4                                                                                     | 67.39(16)  | O4-N8-C2                 | 128.8(7)  |
| O52-Ba1-N4                                                                                    | 152.45(16) | N7-N8-C2                 | 108.4(6)  |
| <sup>1</sup> -x+3/2,y+1/2,-z+3/2 <sup>2</sup> -x+1,-y+1,-z+2 <sup>3</sup> -x+3/2,y-1/2,-z+3/2 |            |                          |           |

**Table S7.** Hydrogen bonds for [Ba(BTF)(H<sub>2</sub>O)<sub>4</sub>]<sub>n</sub> [Å and °].

| Bond D-H···A                                                                                                      | Length/Å (D-H) | Length/Å (H···A) | Length/Å (D···A) | Angle/° (DHA) |
|-------------------------------------------------------------------------------------------------------------------|----------------|------------------|------------------|---------------|
| O(2)-H(2A)···O(1) <sup>1</sup>                                                                                    | 0.93           | 2.18             | 3.005(8)         | 147.6         |
| O(2)-H(2A)···N(5) <sup>2</sup>                                                                                    | 0.93           | 2.59             | 3.067(8)         | 112.5         |
| O(2)-H(2B)···O(7) <sup>1</sup>                                                                                    | 0.93           | 2.04             | 2.795(8)         | 137.4         |
| O(5)-H(5A)···N(2) <sup>3</sup>                                                                                    | 0.95           | 2.05             | 2.910(8)         | 149.8         |
| O(6)-H(6A)···O(3) <sup>3</sup>                                                                                    | 0.95           | 1.79             | 2.699(7)         | 160           |
| O(7)-H(7A)···O(2) <sup>4</sup>                                                                                    | 0.91           | 2.51             | 3.071(9)         | 120.2         |
| O(7)-H(7A)···O(4) <sup>4</sup>                                                                                    | 0.91           | 2.36             | 3.193(9)         | 152.8         |
| O(7)-H(7B)···N(6) <sup>2</sup>                                                                                    | 0.91           | 2.15             | 2.872(10)        | 136.4         |
| <sup>1</sup> -x+1,-y+1,-z+1 <sup>2</sup> -x+3/2,y+1/2,-z+3/2 <sup>3</sup> x+1/2,-y+1/2,z+1/2 <sup>4</sup> x-1,y,z |                |                  |                  |               |
